# Supplementary material for: Fly Ash Particle Size Effect on Pore Structure and Strength of Fly Ash Foamed Geopolymer
Source: Hindawi journal article supplement (doi:10.1155/2019/1098027), 2019-12-29
Supplement: f1 [file 1098027.f1.docx]

Graphical Abstract

The graphical abstract introduces preparation process of (fly ahs foamed geopolymer) FAFG and some characteristcs testing for FAFG. The whole preparation process includes dry raw materials mixing, alkali-activator adding, foaming and curing. Then the FAFG samples will be incised into cubes (70.7mm). Finally characteristics of FAFG will be tested with relevant instruments and methods.


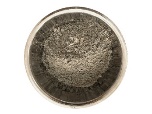

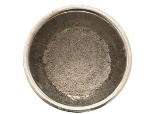

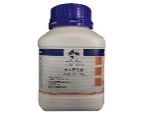

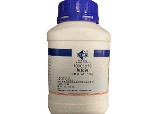

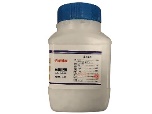

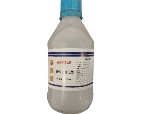

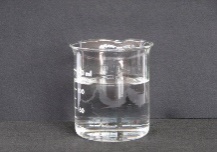


**FLA**

**CC**

**SH**

**SS**

**CO**

**W**

**Dry material mixture**


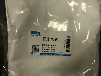


**FA**

**SH**


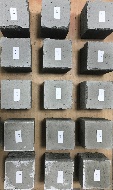

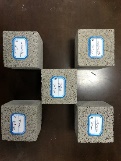


**Cube of 100 mm**

**Central cube of 70.7 mm**

**Incise**

**Alkaline environment**

**Foaming process**

**FAFG**


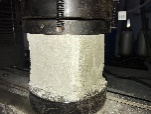

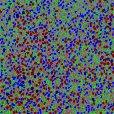

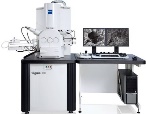


**Strength test**

**Pore information**

**measurement**

**XRD**

**SEM**

**Tests**


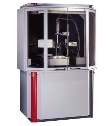


FLA-Fly ash; CC-Cement Clinker; SH-Sodium hydroxide; CO-Calcium oxide; SS-Sodium sulfate; CS-Calcium stearate; HP-Hydrogen peroxide; W-Water
